# Supplementary material
Source: publisher figshare collection journal article supplement (https://acs.figshare.com/ndownloader/files/3777544)
Supplement: Supplementary file 1 [file 3777544]

## Supporting Information

### Facile Decoration of Multiwalled Carbon Nanotubes with Hetero-oligophenylene Stabilized-Gold Nanoparticles: Visible Light Photocatalytic Degradation of Rhodamine B Dye

**Sharanjeet Kaur, Vandana Bhalla,\* and Manoj Kumar\***

*Department of chemistry, UGC Center for Advanced Studies Guru Nanak Dev University,  
Amritsar, INDIA-143005*

\*E-mail: vanmanan@yahoo.co.in, mksharmaa@yahoo.co.in

#### Page No. Contents

- S-2 to S-4**  $^1\text{H}$ ,  $^{13}\text{C}$  NMR and Mass spectra of derivative **3**.
- S-5** Fluorescence spectra of derivative **3** in different  $\text{H}_2\text{O}$ /TEG mixture and scanning electronic microscopy image of derivative **3** in  $\text{H}_2\text{O}$ : $\text{CH}_3\text{CN}$  mixture.
- S-6** Dynamic light scattering studies of derivative **3** in  $\text{H}_2\text{O}$ / $\text{CH}_3\text{CN}$  (6/4) mixture and ratiometric combinational curve  $I_{485}/I_{355}$  as a function of  $[\text{Au}^{3+}]$  increased.
- S-7** Overlay  $^1\text{H}$  NMR spectrum of derivative **3** in presence of 10 eq. of  $\text{Au}^{3+}$  ions in  $\text{CDCl}_3/\text{CD}_3\text{OD}/\text{D}_2\text{O}$  (1:6:3).
- S-8** Calibration curve for  $\text{Au}^{3+}$  ( $\mu\text{M}$ ) over the range of 0 – 75  $\mu\text{M}$  of  $\text{Au}^{3+}$  and detection limit plot of derivative **3** for  $\text{Au}^{3+}$  ions.
- S-9** Fluorescence emission spectra of derivative **3** in presence of various metal chloride/perchlorate in  $\text{H}_2\text{O}$ / $\text{CH}_3\text{CN}$  (6/4) mixture and overlay  $^1\text{H}$  NMR spectrum of derivative **3** in presence of 10 eq. of  $\text{Au}^{3+}$  ions in  $\text{CDCl}_3/\text{CD}_3\text{OD}/\text{D}_2\text{O}$  (1:6:3).
- S-10** Fluorescence life time decay profile of derivative **3** in  $\text{CH}_3\text{CN}$  and  $\text{H}_2\text{O}$ / $\text{CH}_3\text{CN}$  (5/5) mixture.
- S-11** Overlay  $^1\text{H}$  NMR spectra of derivative **3** in  $\text{CDCl}_3$  and organic part obtained after washing in-situ generated gold nanoparticles.
- S-12** UV-vis spectra of derivative **3** in presence of  $\text{Au}^{3+}$  ions in  $\text{CH}_3\text{CN}$  and fluorescence emission spectra of derivative **3** in presence of tery-butyl hydroperoxide in  $\text{H}_2\text{O}$ : $\text{CH}_3\text{CN}$  (6:4) mixture.
- S-13** Dynamic light scattering analysis of gold nanoparticles and absorption spectra of the supernatants obtained from three subsequent washing steps in the preparation of AuNPs@MWCNTs nanohybrid materials.
- S-14** UV-vis spectra of gold nanoparticles before and after they are adsorbed onto the surface of multi walled carbon nanotubes and fluorescence emission spectra of AuNPs@MWCNTs nanohybrid materials.
- S-15** TEM images of AuNPs@MWCNTs nanohybrid and FT-IR spectra of derivative **3**, derivative **3** stablized AuNPs and AuNPs@MWCNTs hybrid.

**S-16** Pseudo-first-order kinetic for the photodegradation of RhB over AuNPs@MWCNTs and dye adsorption efficiency and photocatalytic efficiency of the recycled AuNPs@MWCNTs nanocatalyst to RhB.

**S-17** TEM images of the AuNPs@MWCNTs nanohybrid catalyst after three runs of photocatalytic degradation of RhB and table showing fluorescence lifetime of derivative **3** in absence and presence of Au<sup>3+</sup> ions (15 equiv) in H<sub>2</sub>O/CH<sub>3</sub>CN (6:4, v/v).

**S-18** Comparison of present method over other reported procedure in literature for the preparation of AuNPs@MWCNTs nanohybrid materials.

**S-19** Comparison of catalytic efficiency of AuNPs@MWCNTs nanohybrid materials for photocatalytic degradation of RhB reported in present manuscript with other catalytic systems in the literature.

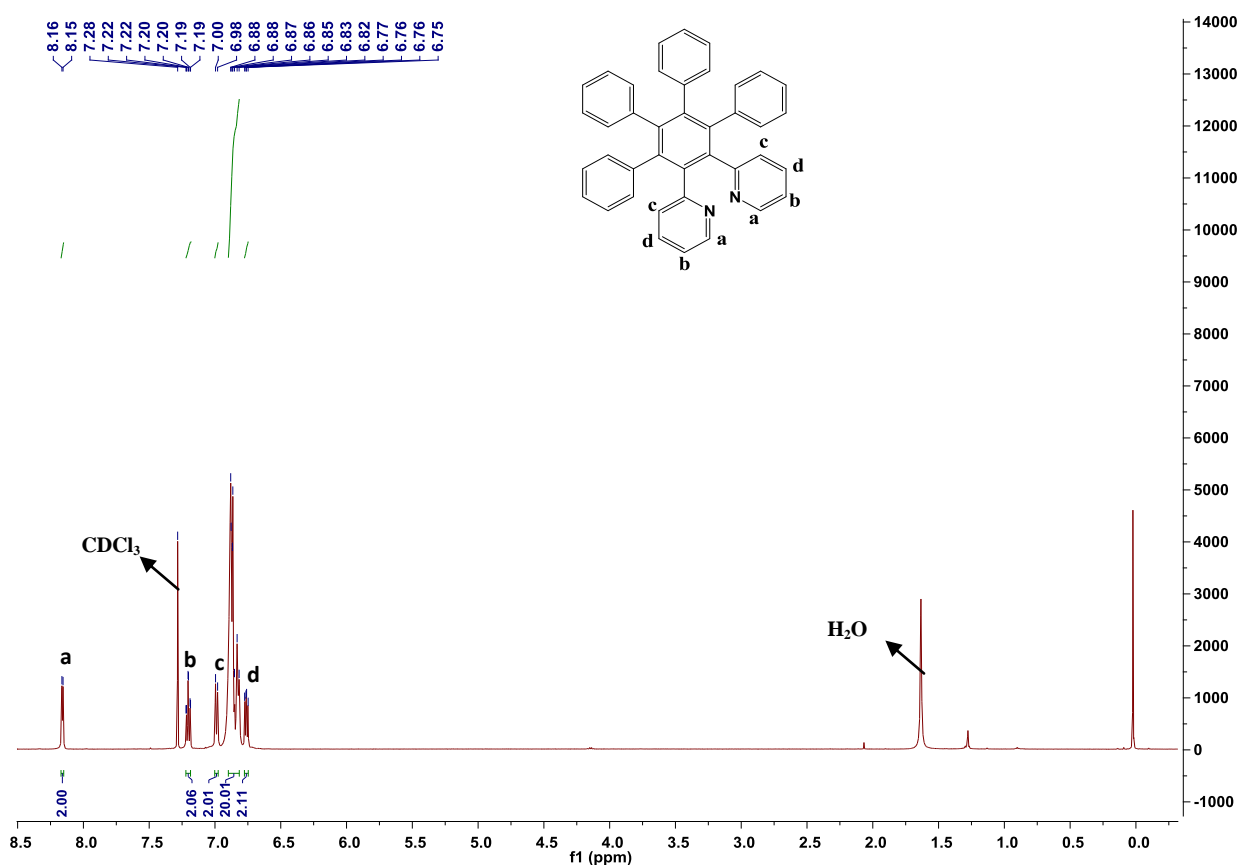

**Fig. S1** <sup>1</sup>H NMR spectrum of derivative **3** (500 MHz, CDCl<sub>3</sub>)

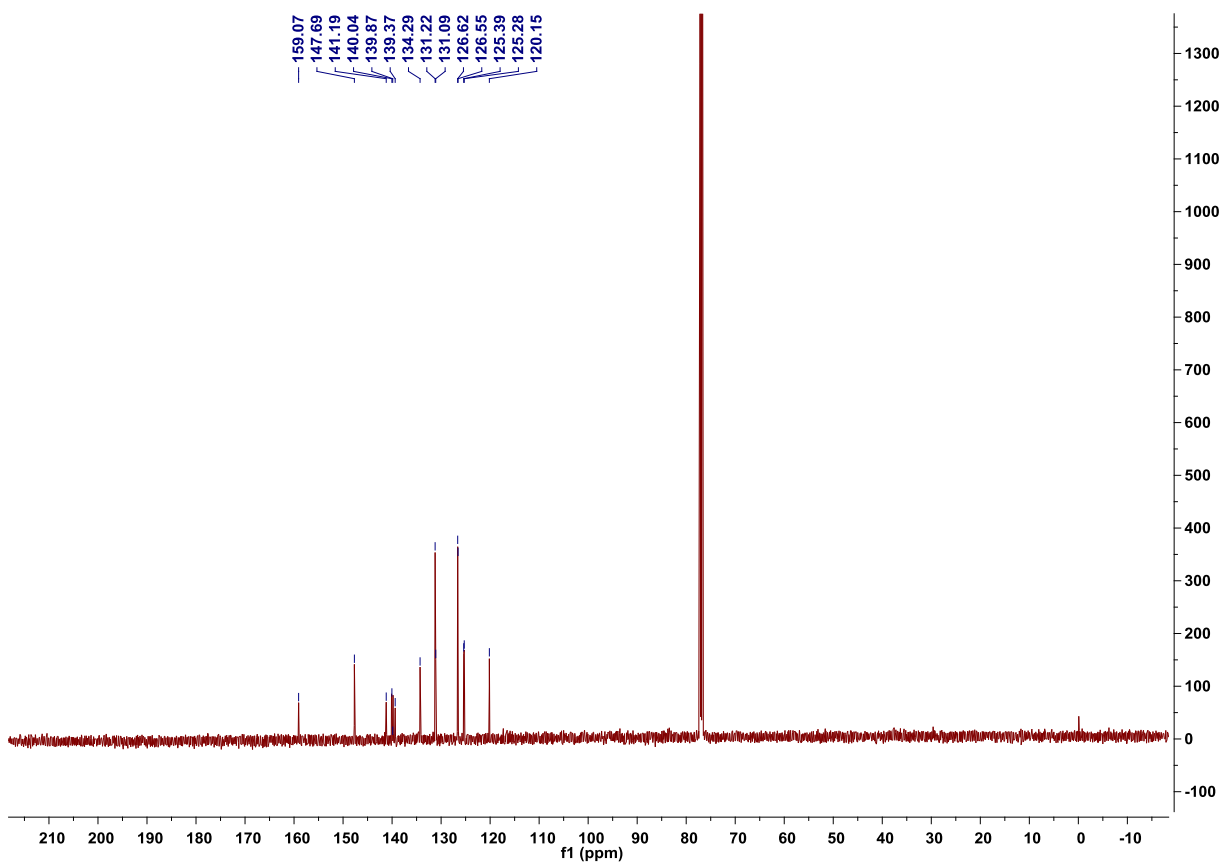

**Fig. S2** <sup>13</sup>C NMR spectrum of derivative **3** (75 MHz, CDCl<sub>3</sub>)

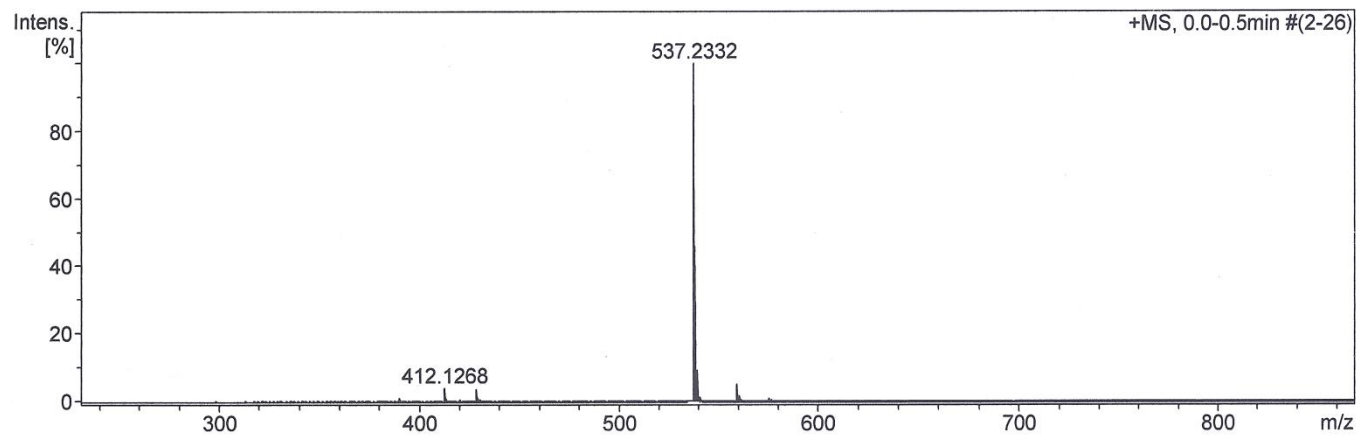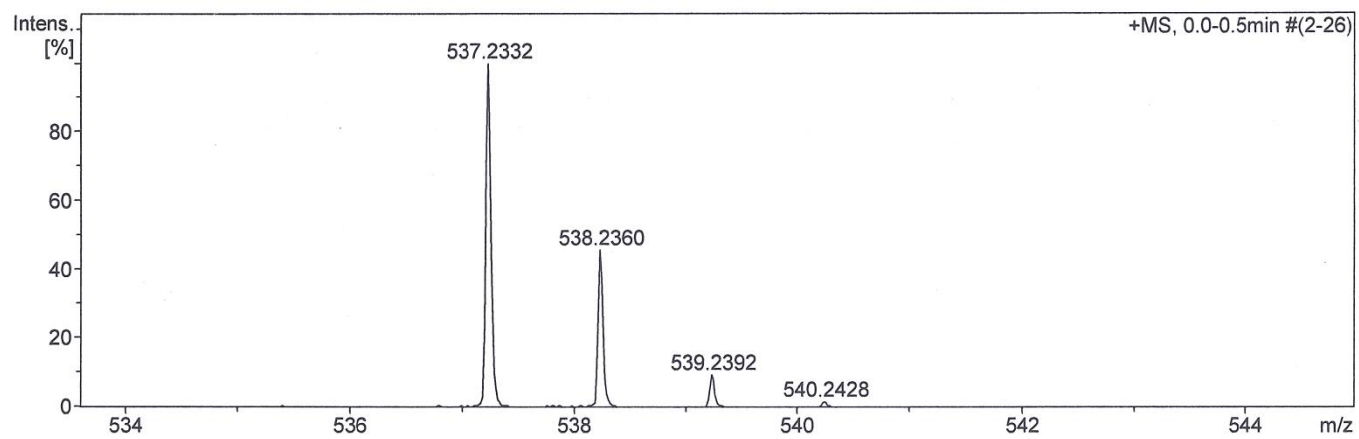

**Figure S3** Mass spectrum of derivative **3**.

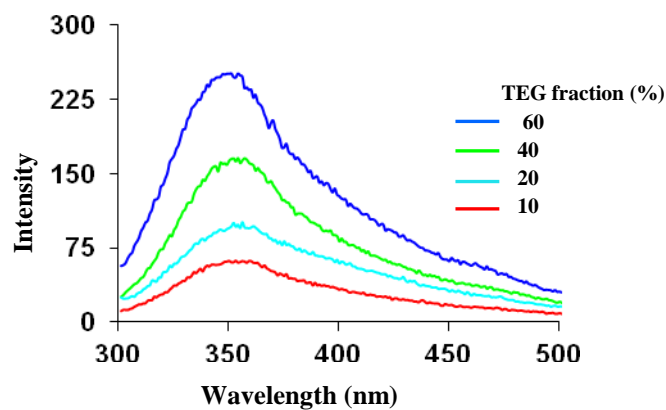

**Fig. 4** Fluorescence spectra of compound **3** (5  $\mu$ M) showing the variation of fluorescence intensity in TEG/ $\text{CH}_3\text{CN}$  mixture (0 to 60% volume fraction of TEG in acetonitrile);  $\lambda_{\text{ex}}$  = 290 nm.

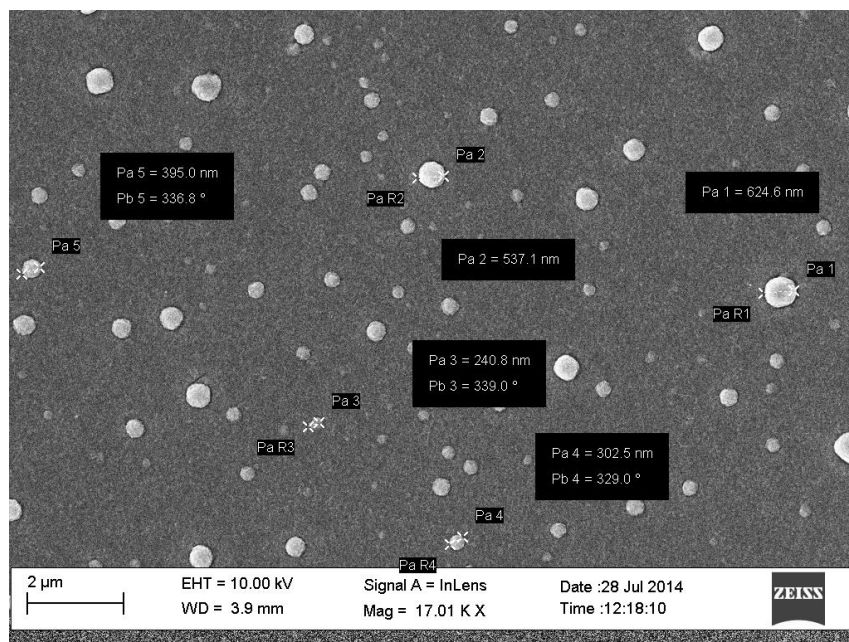

**Fig. S5** SEM image of aggregates of compound **3** in  $\text{H}_2\text{O}/\text{CH}_3\text{CN}$  (6:4) mixture.

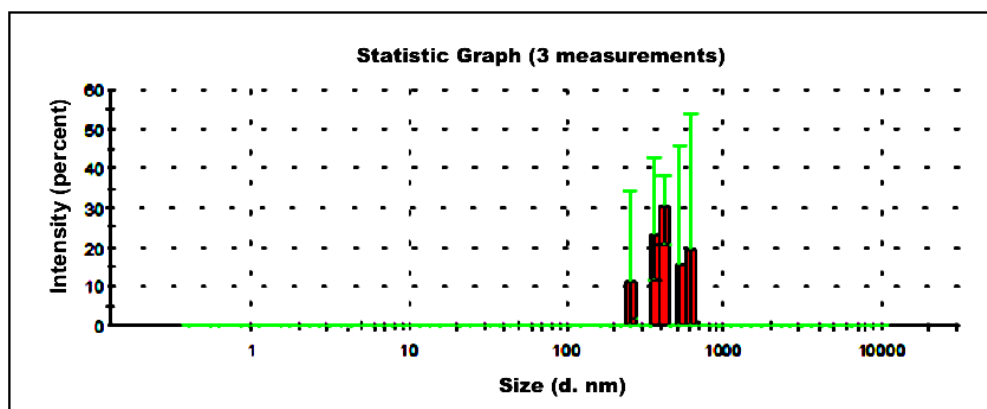

**Fig. S6** The dynamic light scattering (DLS) studies derivative **3** showing the average diameter of aggregates is in the range of 500 nm in H<sub>2</sub>O/CH<sub>3</sub>CN (6/4).

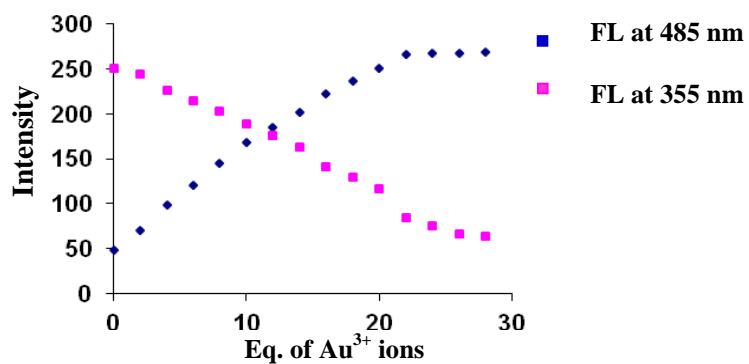

**Fig. S7** Ratiometric combinational curve  $I_{485}$  (blue) and  $I_{355}$  (pink) as a function of  $[Au^{3+}]$  increased.

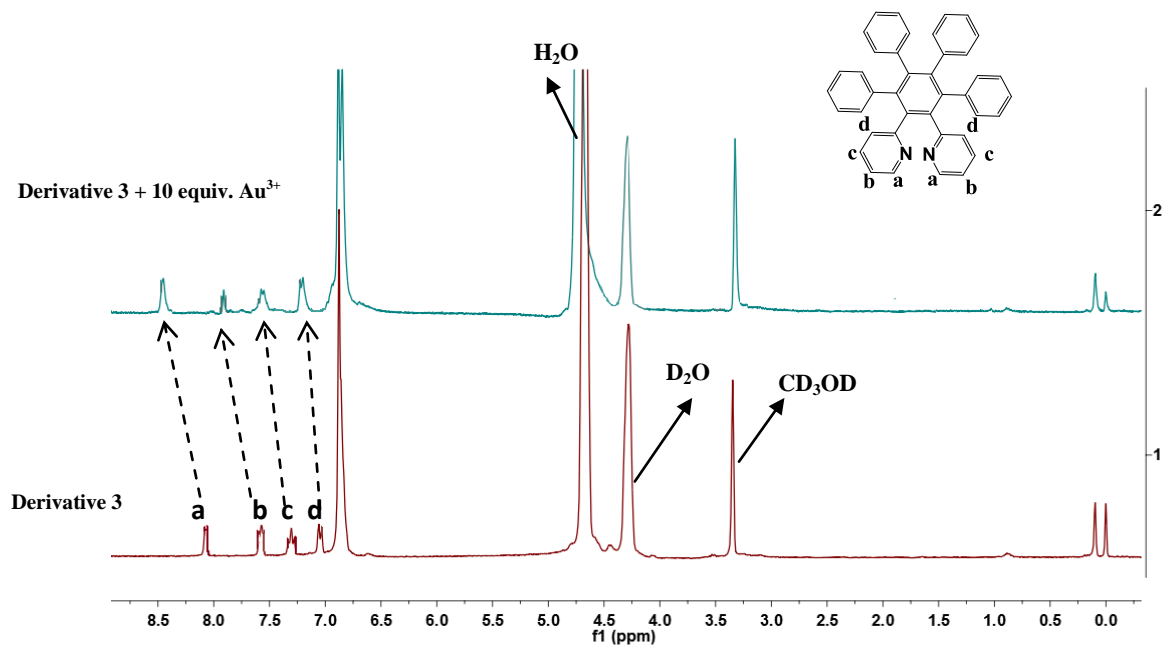

**Fig. S8a**  $^1\text{H}$  NMR titration of compound **3** with  $\text{Au}^{3+}$  ions in  $\text{CDCl}_3/\text{CD}_3\text{OD}/\text{D}_2\text{O}$  (1:6:3).

| Derivative 3 ( $\delta_1$ ppm)   | <b>3</b> + 10 equiv. $\text{Au}^{3+}$ ( $\delta_2$ ppm) | $\Delta\delta = \delta_1 - \delta_2$ |
|----------------------------------|---------------------------------------------------------|--------------------------------------|
| 8.1 (d, 2H, ArH) <b>(a)</b>      | 8.5 (d)                                                 | 0.4                                  |
| 7.52-7.6 (m, 2H, ArH) <b>(b)</b> | 7.7-7.78 (m)                                            | 0.18                                 |
| 7.3-7.39 (m, 2H, ArH) <b>(c)</b> | 7.49-7.55 (m)                                           | 0.19                                 |
| 7.12 (d, 2H, ArH) <b>(d)</b>     | 7.23 (d)                                                | 0.11                                 |

**Fig. S8b** Change in chemical shift ( $\delta$ ) value of compound **3** before and after addition of  $\text{Au}^{3+}$  ions in  $\text{CDCl}_3/\text{CD}_3\text{OD}/\text{D}_2\text{O}$  (1:6:3).

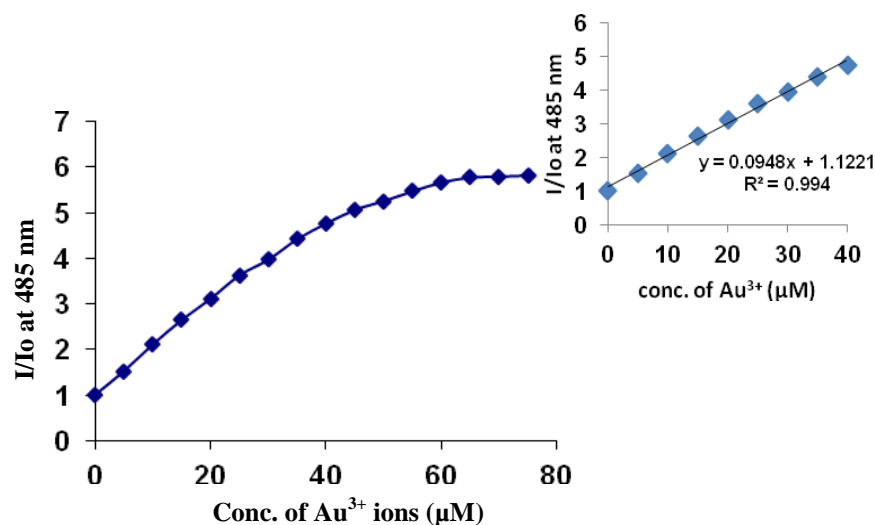

**Fig. S9** Calibration curve for  $\text{Au}^{3+}$  ( $\mu\text{M}$ ) over the range of 0 – 75  $\mu\text{M}$  of  $\text{Au}^{3+}$ . Inset the fluorescence intensity of derivative **3** at 485 nm showed a linear response to  $\text{Au}^{3+}$  in the concentration range of 0 to 40  $\mu\text{M}$ .

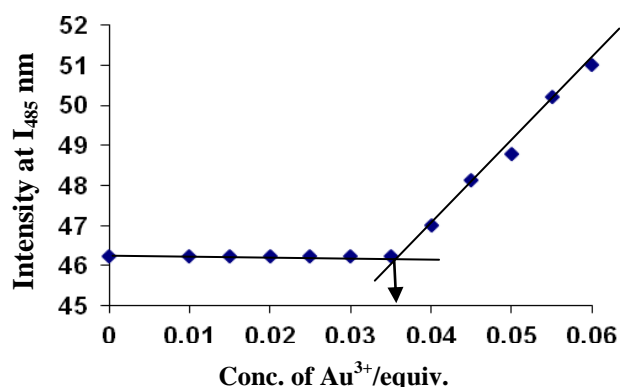

**Fig. S10** Showing the fluorescence intensity of derivative **3** at 485 nm as a function of  $\text{Au}^{3+}$  ions concentration (equiv.) in  $\text{H}_2\text{O}/\text{CH}_3\text{CN}$  (6:4, v/v),  $\lambda_{\text{ex}} = 300$  nm.

To determine the detection limit, fluorescence titration of compound **3** with  $\text{Au}^{3+}$  ions was carried out by adding aliquots of gold solution (in equiv.) and the fluorescence intensity as a function of  $\text{Au}^{3+}$  ions added was then plotted. From this graph the concentration at which there was a sharp change in the fluorescence intensity multiplied with the concentration of receptor **3** gave the detection limit.

**Equation used for calculating detection limit (DL):**

$$\text{DL} = \text{CL} \times \text{CT}$$

CL = Conc. of Ligand; CT = Conc. of Titrant at which change observed.

**Detection limit (DL) of  $\text{Au}^{3+}$  ions with **3**:**

$$\text{Thus; DL} = 0.036 \times 10^{-6} = 36 \times 10^{-9} = 36 \text{ nM.}$$



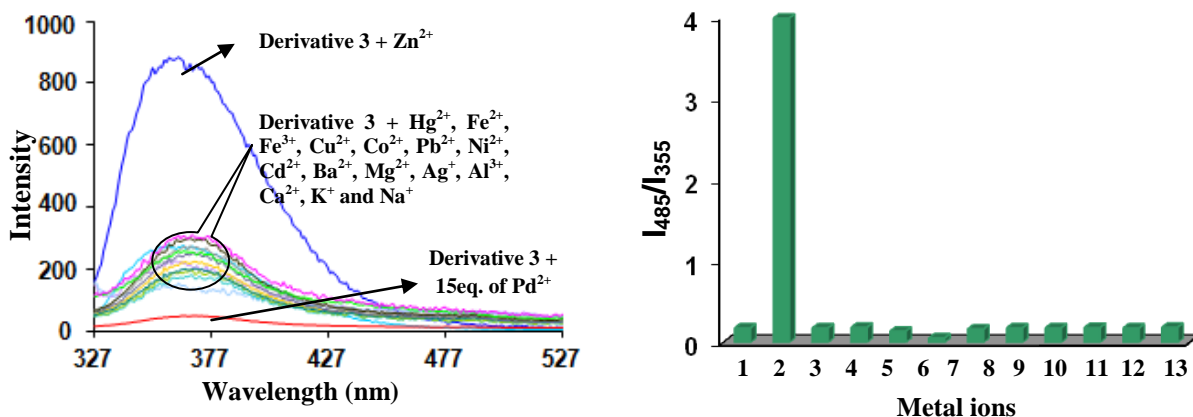

**Fig. S11** Fluorescence emission spectra of derivative **3** (5  $\mu\text{M}$ ) with the addition of different metal ions (25 equiv.) in  $\text{H}_2\text{O}/\text{CH}_3\text{CN}$  (6:4), buffered with HEPES pH = 7.2 (B) Fluorescence selectivity ( $I_{490}/I_{363}$ ) of **3** (5  $\mu\text{M}$ ) in the presence of various metal ions (25 equiv each); 1 =  $\text{Hg}^{2+}$ , 2 =  $\text{Co}^{2+}$ , 3 =  $\text{Pb}^{2+}$ , 4 =  $\text{Ni}^{2+}$ , 5 =  $\text{Cd}^{2+}$ , 6 =  $\text{Pd}^{2+}$ , 7 =  $\text{Zn}^{2+}$ , 8 =  $\text{Cu}^{2+}$ , 9 =  $\text{Ba}^{2+}$ , 10 =  $\text{Mg}^{2+}$ , 11 =  $\text{K}^+$ , 12 =  $\text{Na}^+$ , and 13 =  $\text{Li}^+$

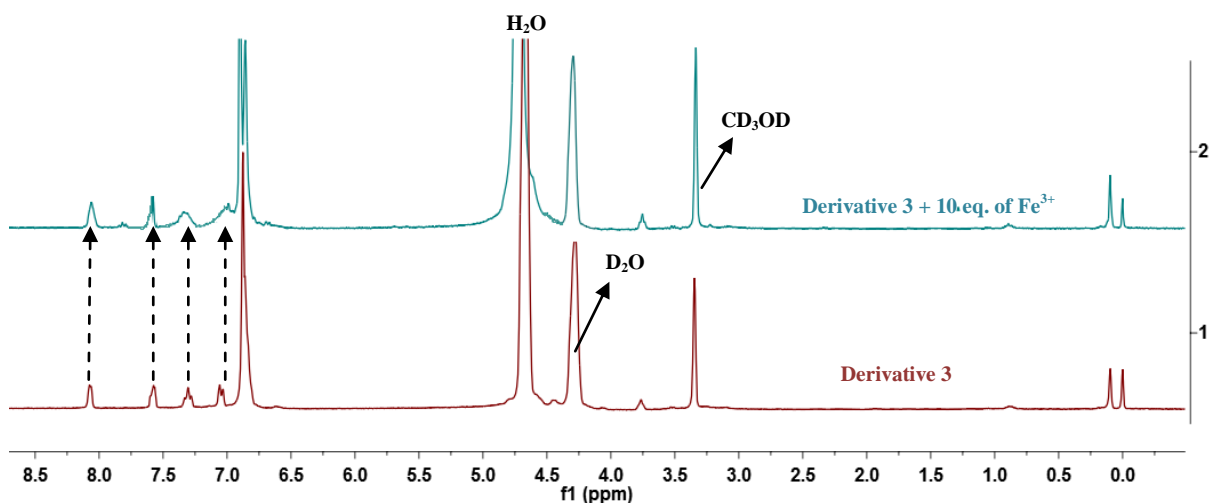

**Fig. S12**  $^1\text{H}$  NMR titration of compound **3** with  $\text{Fe}^{3+}$  ions in  $\text{CDCl}_3/\text{CD}_3\text{OD}/\text{D}_2\text{O}$  (1:6:3).

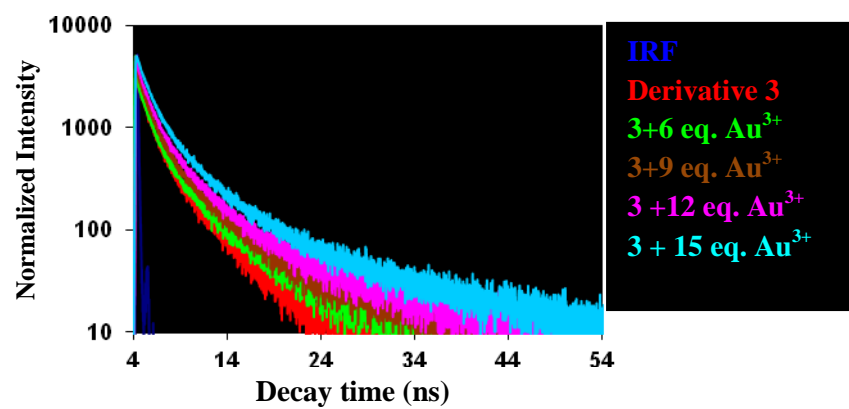

**Fig. S13** Exponential fluorescence decays of **3** on addition of different amount of Au<sup>3+</sup> ions measured at 485 nm. Spectra were acquired in H<sub>2</sub>O/CH<sub>3</sub>CN (6:4,v/v) mixture,  $\lambda_{\text{ex}}$ = 375 nm.

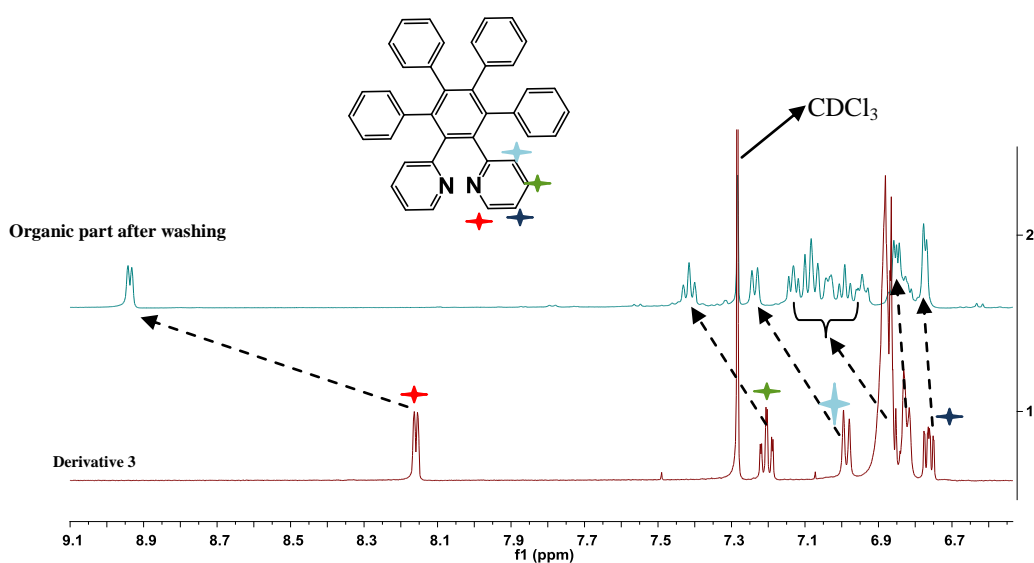

**Fig. S14a** Overlay  $^1\text{H}$  NMR spectra of derivative **3** in  $\text{CDCl}_3$  and organic part obtained after washing in-situ generated gold nanoparticles.

| Derivative 3 ( $\delta_1$ ppm) | Organic part after treatment with gold ( $\delta_2$ ppm) | $\Delta\delta = \delta_1 - \delta_2$ |
|--------------------------------|----------------------------------------------------------|--------------------------------------|
| 8.16 (d, 2H, ArH) ★            | 8.95 (d)                                                 | 0.79                                 |
| 7.20-7.28 (m, 2H, ArH) ★       | 7.39-7.42 (m)                                            | 0.14                                 |
| 6.99 (d, 2H, ArH) ★            | 7.21 (d)                                                 | 0.22                                 |
| 6.88-6.82 (m, 20H, ArH)        | Downfield splitting                                      | -----                                |
| 6.75-6.77 (m, 2H, ArH) ★       | 6.77-6.79                                                | 0.02                                 |

**Fig. S14b** Change in chemical shift ( $\delta$ ) value of compound **3** before and after formation of gold nanoparticles in  $\text{CDCl}_3$ .

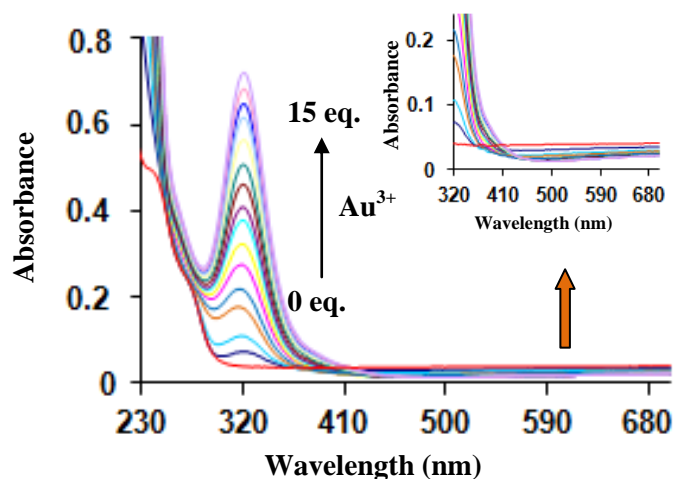

**Fig. S15** UV-vis spectra of compound **3** (5  $\mu\text{M}$ ) upon additions of 15 eq. of  $\text{Au}^{3+}$  ions in  $\text{CH}_3\text{CN}$ . Inset showing no Surface Plasmon Resonance band was appeared around 550 nm.

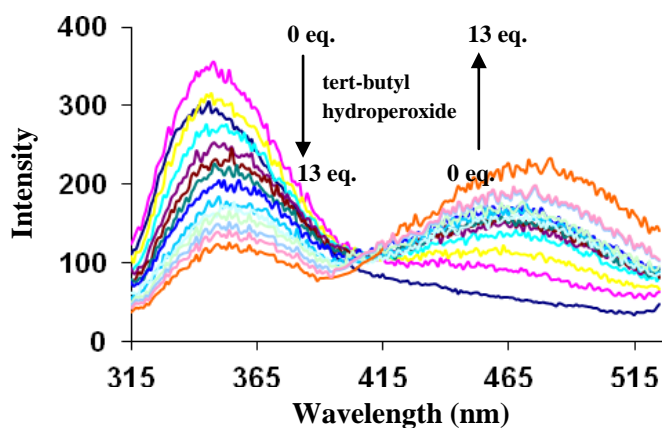

**Fig S16** Fluorescence emission spectra of derivative **3** (5  $\mu\text{M}$ ) upon additions of 13 equiv. of 70 wt% tert-butyl hydroperoxide solution in  $\text{H}_2\text{O}:\text{CH}_3\text{CN}$  (6/4) mixture.

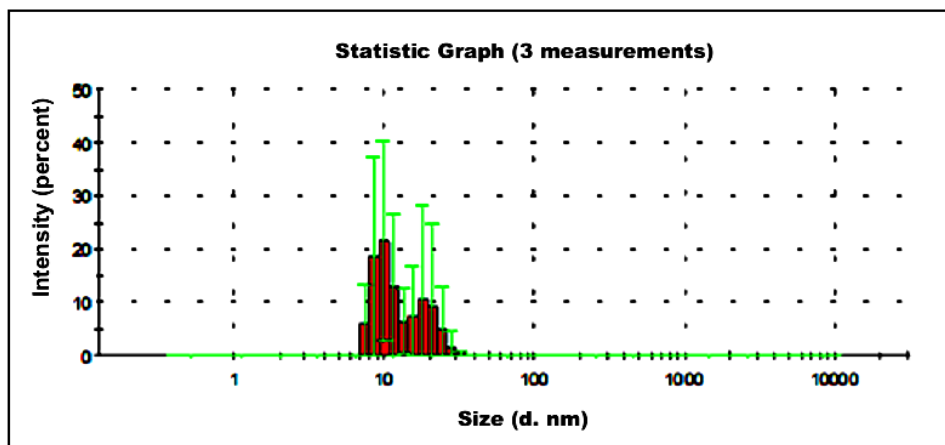

**Fig. S17** The dynamic light scattering (DLS) studies of *in-situ* generated gold nanoparticles.

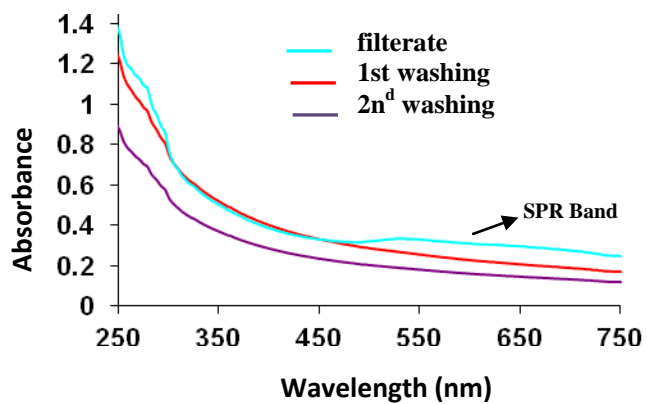

**Fig. S18** Absorption spectra of the supernatants obtained subsequent washing steps in the preparation of AuNPs@MWCNTs nanohybrids.

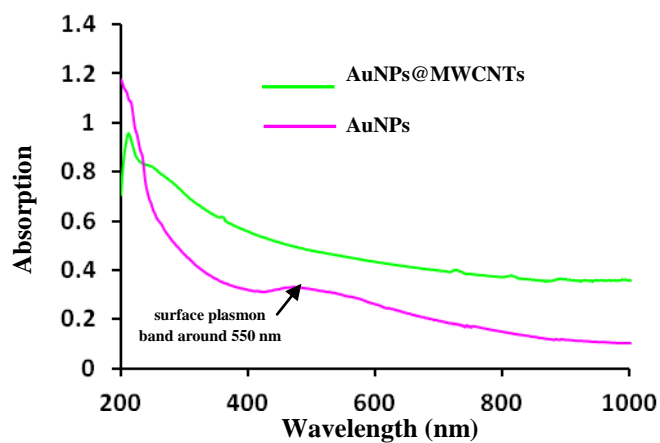

**Fig. S19** UV-vis spectra of gold nanoparticles before and after they are adsorbed onto the surface of multi walled carbon nanotubes.

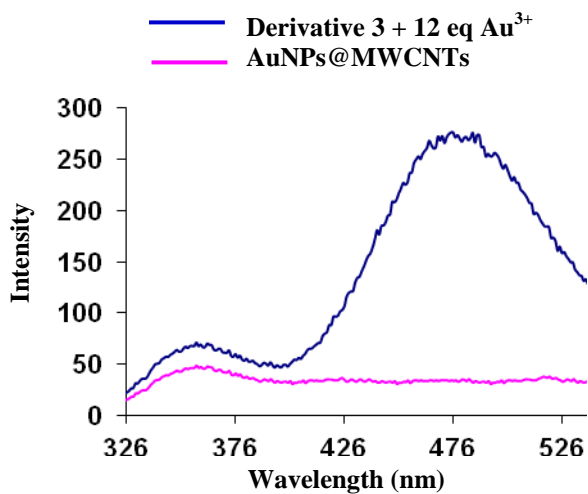

**Fig S20** Fluorescence emission spectra of derivative **3** in presence of  $\text{Au}^{3+}$  and so prepared AuNPs@MWCNTs nanohybrid.

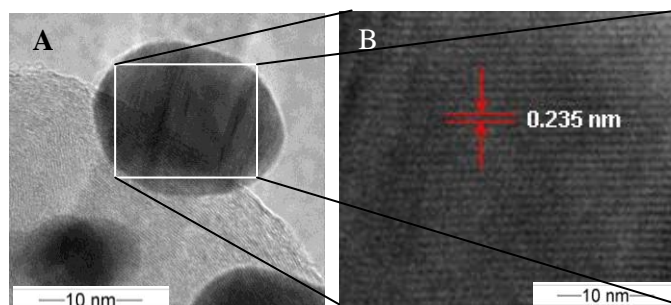

**Fig. S21** (A) Magnified TEM images of AuNP@MWCNTs composites aligned Au NPs on the MWCNTs; (B) HRTEM of AuNPs decorated on MWCNTs.

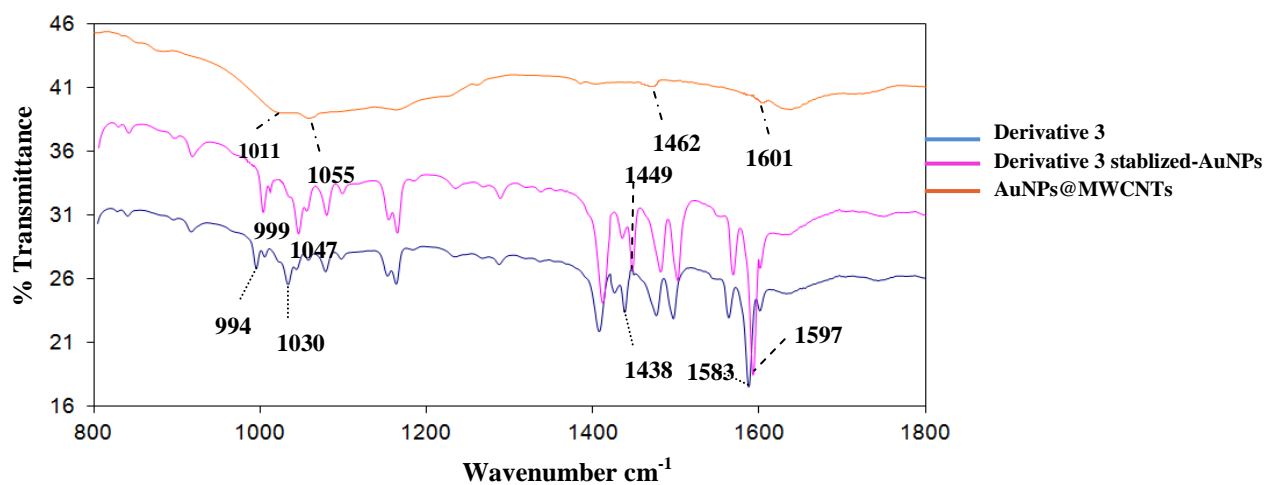

**Fig. S22** The overlay FT-IR spectrum of derivative **3**, derivative **3** stabilized-AuNPs and AuNPs@MWCNTs hybrid material.

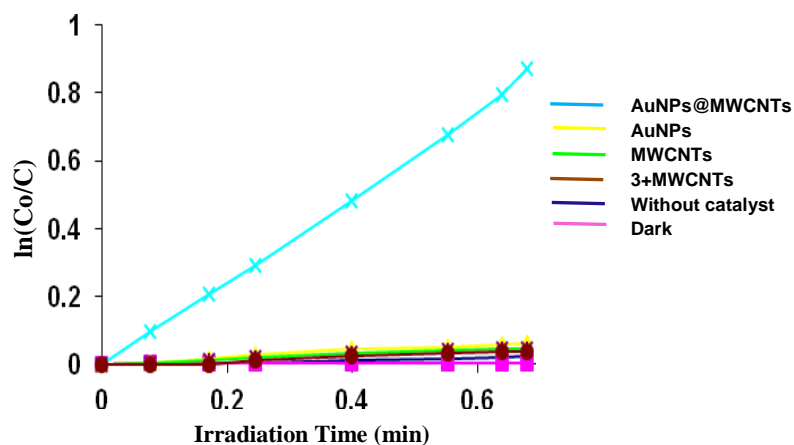

**Fig. S23** The pseudo-first-order kinetic for the photodegradation of RhD B over AuNPs@MWCNTs, AuNPs, without catalyst and in dark.

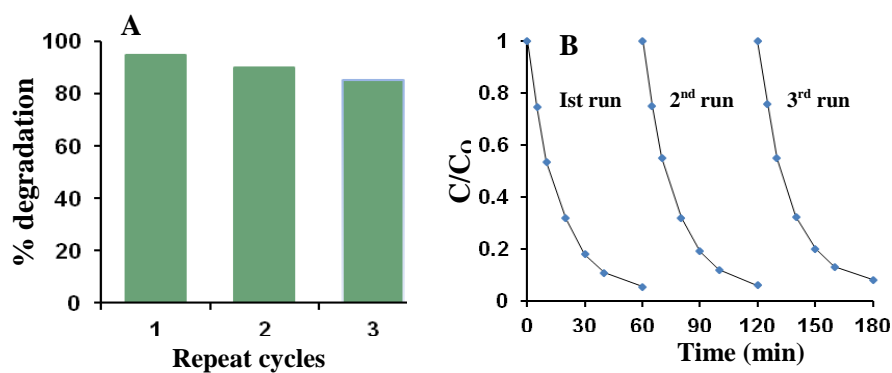

**Fig. S24** (A) Dye adsorption efficiency and photocatalytic efficiency of the recycled AuNPs@MWCNTs nanocatalyst to RhB of separate 3 cycles of the continuous dark-adsorption and photocatalytic processes. (B) Repeated photocatalytic degradation of RhB on AuNPs@MWCNTs nanocatalyst under Visible light illumination.



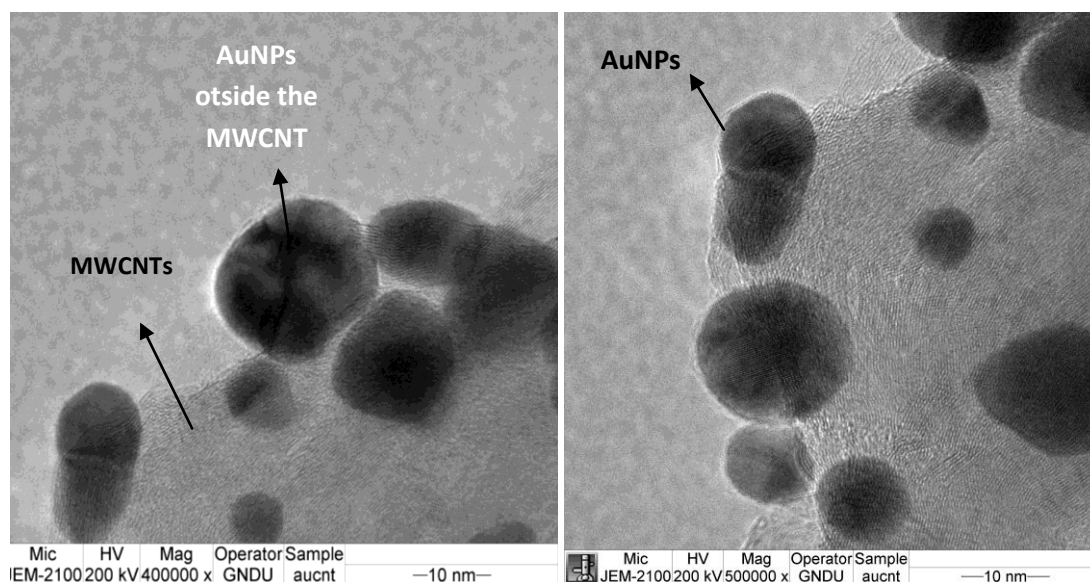

**Fig. S25** TEM images of the AuNPs@MWCNTs nanohybrid catalyst after three runs of photocatalytic degradation of RhB.

**Table S1:** Fluorescence lifetime of derivative **3** in absence and presence of  $\text{Au}^{3+}$  ions (15 equiv) in  $\text{H}_2\text{O}/\text{CH}_3\text{CN}$  (6:4, v/v) mixture at 485 nm.  $A_1$ ,  $A_2$ ,  $A_3$ : fractional amount of molecules in each environment.  $\tau_1$ ,  $\tau_2$  and  $\tau_3$ : biexponential life time of aggregates in 60 vol% of water in  $\text{CH}_3\text{CN}$ ;  $k_f$ : radiative rate constant ( $k_f = \Phi/\tau_{\text{avg}}$ );  $k_{\text{nr}}$ : nonradiative rate constant ( $k_{\text{nr}} = (1 - \Phi)/\tau_{\text{avg}}$ );  $\lambda_{\text{ex}} = 375$  nm

| Sample                    | Quantum Yield | $A_1/A_2/A_3$     | $\tau_1$ (ns) | $\tau_2$ (ns) | $\tau_3$ (ns) | $\tau_{\text{avg}}$ (Average lifetime, ns) | $k_f(10^9\text{s}^{-1})$ | $k_{\text{nr}}(10^9\text{s}^{-1})$ |
|---------------------------|---------------|-------------------|---------------|---------------|---------------|--------------------------------------------|--------------------------|------------------------------------|
| Derivative 3              | 0.21          | 49.85/50.15       | 0.272         | 2.568         | ----          | 1.42                                       | 0.126                    | 0.55                               |
| 3+15 eq. $\text{Au}^{3+}$ | 0.32          | 51.16/26.74/22.10 | 3.531         | 0.919         | 17.470        | 5.91                                       | 0.05                     | 0.116                              |

**Table S2:** Comparison of present method for the preparation of AuNPs@CNTs nanohybrid materials over other reported procedure in literature.

| S.No | Publication                                 | Method of formation of AuNPs@CNTs nanohybrid       | Reagent used                                                                                                                                                                         | Reducing agent              | Temp.      | Total Time taken to prepare AuNPs@CNTs nanohybrid | Reusability |
|------|---------------------------------------------|----------------------------------------------------|--------------------------------------------------------------------------------------------------------------------------------------------------------------------------------------|-----------------------------|------------|---------------------------------------------------|-------------|
| 1.   | Present Manuscript                          | Wet-chemical method                                | Derivative 3 in H <sub>2</sub> O/CH <sub>3</sub> CN, H <sub>2</sub> SO <sub>4</sub> , MWCNT and gold chloride                                                                        | No                          | RT         | Overnight                                         | Yes         |
| 2.   | Analyst, 2015, 140, 134–139                 | Frens' method                                      | ammonium hydroxide, H <sub>2</sub> SO <sub>4</sub> , HNO <sub>3</sub> , tetraethoxysilane), 3-aminopropyl-trimethoxysilane, 4-nitro thiophenol, Hydrogen tetrachloroaurate and MWCNT | trisodium citrate dihydrate | Room temp. | 23 hrs                                            | No          |
| 3.   | Beilstein J. Nanotechnol. 2014, 5, 910–918  | plasma enhanced chemical vapour deposition (PECVD) | VA-CNT, Ag paste, Pt resistor and Au wires                                                                                                                                           | -----                       | 170 °C     | 30 min                                            | No          |
| 4.   | ACS Sustainable Chem. Eng. 2013, 1, 746–752 | layer-by-layer (LBL) assembly method               | Polyethyleneimine, HAuCl <sub>4</sub> , trisodium citrate and vertically aligned CNTs                                                                                                | trisodium citrate           | 100 °C     | 24 hr                                             | No          |
| 5.   | Nanoscale Research Letters 2014, 9:207      | chemical vapor deposition                          | O <sub>2</sub> /Ar atmosphere, HAuCl <sub>4</sub> /2-propanol and CNT-AAO composite                                                                                                  | -----                       | 450 °C     | 26 hr                                             | No          |
| 6.   | J. Phys. Chem. C 2014, 118, 27028–27038     | -----                                              | Diocetylamine, tetraoctylammonium chloride, NABH <sub>4</sub> , pyr-SH derivative, HAuCl <sub>4</sub> and SWCNTs                                                                     | NABH <sub>4</sub>           | RT         | overnight                                         | No          |

**Table S3:** Comparison of catalytic activity of AuNPs@MWCNTs nanohybrid generated by utilizing derivative **3** for photocatalytic dye degradation of Rhodamine B under visible light source over other nanohybrid materials reported in literature.

| S.No | Publication                                             | Catalyst used                                                      | Time taken for dye degradation | Source of light used                            | Rate constant                            | reusability |
|------|---------------------------------------------------------|--------------------------------------------------------------------|--------------------------------|-------------------------------------------------|------------------------------------------|-------------|
| 1    | Present manuscript                                      | AuNP@MWCNTs                                                        | 45 min                         | 300 W tungsten lamp                             | $0.066 \text{ min}^{-1}$                 | Yes         |
| 2    | J. Am. Chem. Soc. 2015, 137, 2975–2983                  | Ti-Defected $\text{TiO}_2$ material                                | 3 hr                           | 300 W Xenon lamp                                | ----                                     | -----       |
| 2    | ACS Appl. Mater. Interfaces 2015, 7, 4368–4380          | $\text{TiO}_2$ materials                                           | 60 min                         | 1000W Xe arc lamp                               | $0.0183 \times 10^{-3} \text{ min}^{-1}$ | No          |
| 3    | ACS Appl. Mater. Interfaces 2015, 7, 1616–1623          | Au decorated $\text{ZnSe} \cdot 0.5\text{N}_2\text{H}_4$ Hybrid    | 240 min                        | 500W Xe arc lamp                                | $0.007 \text{ min}^{-1}$                 | No          |
| 4    | DOI: 10.1021/jp5108679 J. Phys. Chem. C, 2015           | $\text{BiF}_3\text{--Bi}_2\text{NbO}_5\text{F}$                    | 90 min                         | 300 W Xenon lamp                                | $0.023 \text{ min}^{-1}$                 | Yes         |
| 5    | J. Phys. Chem. C 2014, 118, 21447–21456                 | CdS nano structures                                                | 75 min                         | 850 W xenon lamp                                | $0.012 \text{ min}^{-1}$                 | No          |
| 6    | ACS Appl. Mater. Interfaces 2014, 6, 613–621            | graphene– $\text{SnO}_2$ aerosol nanocomposites                    | 40 min                         | 300 W xenon lamp ( $\lambda > 420 \text{ nm}$ ) | $0.091 \text{ min}^{-1}$                 | No          |
| 7    | DOI: 10.1021/am507085u ACS Appl. Mater. Interfaces      | Au-Decorated $\text{ZnSe} \cdot 0.5\text{N}_2\text{H}_4$ Nanowires | 90 min                         | xenon lamp (500 W)                              | $0.013 \text{ min}^{-1}$                 | No          |
| 8    | DOI: 10.1021/sc5006473 ACS Sustainable Chem. Eng        | A BiOBr/reduced graphene oxide (RGO) composite                     | 5 hr                           | A 300 W Xe lamp                                 | -----                                    | Yes         |
| 9    | Ind. Eng. Chem. Res. 2015, 54, 153–16                   | Graphene/MIL-53(Fe) composites                                     | 60 min                         | 500W Xe arc lamp                                | $0.07 \text{ min}^{-1}$                  | Yes         |
| 10   | ACS Appl. Mater. Interfaces 2012, 4, 3084–3090          | Graphene Oxide/ $\text{ZnO}$ nano Composite                        | 60 min                         | sunlight                                        | -----                                    | Yes         |
| 11.  | DOI: 10.1021/acsami.5b00980 ACS Appl. Mater. Interfaces | $\text{ZnO:I/TiO}_2$ NRs                                           | 6 hr                           | 500 W Xe lamp                                   | -----                                    | Yes         |
